# Supplementary figures and images for: Pan-Cancer Analysis of the Carcinogenic Effect of Nuclear Respiratory Factor-1 (NRF1) in Human Tumors
Source: Research Square preprint supplement (doi:10.21203/rs.3.rs-970754/v1), 2021-11-01

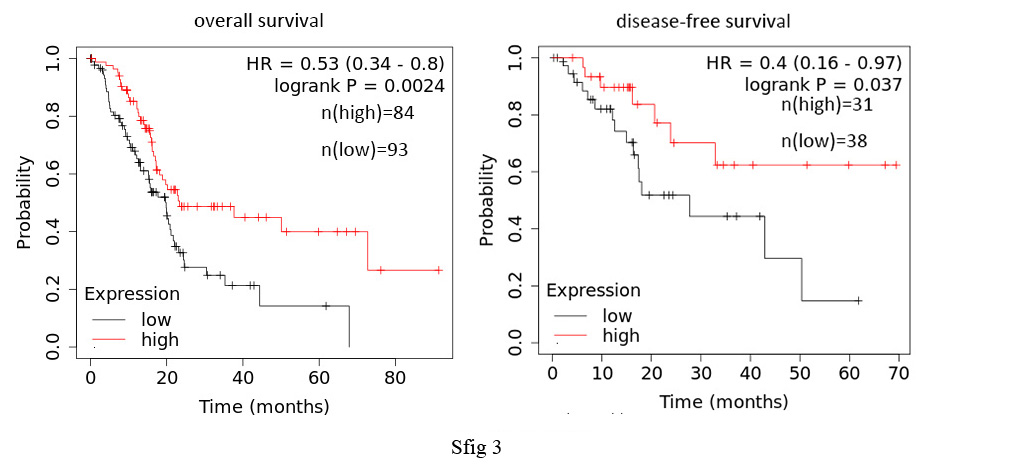


**Figure S3. The survival prognosis of NRF1 gene expression in PAAD are given by Kaplan-Meier.**

Supplement: Supplementary file 1 [file 7d87407e1c8a6cecbf8c64cd.docx]
